# Supplementary material for: pH-Dependent interaction mechanism of lignin nanofilms
Source: Royal Society of Chemistry journal article supplement (doi:10.1039/d1nr06076g), 2021-01-01
Supplement: d1nr06076g1.pdf [file d1nr06076g1.pdf]

## Electronic Supplementary Information (ESI)

### pH-Dependent interaction mechanism of lignin nanofilms

Seo Yoon Lee,<sup>a</sup> Jinhoon Lee,<sup>a</sup> Yoojung Song,<sup>ab</sup> Markus Valtiner,<sup>c</sup> Dong Woog Lee<sup>a\*</sup>

<sup>a</sup> School of Energy and Chemical Engineering, Ulsan National Institute of Science and Technology (UNIST), Ulsan, 44919, Republic of Korea

<sup>b</sup> Make-up Lab., Kolmar Korea, Seoul, 06792, Republic of Korea

<sup>c</sup> Vienna University of Technology, Institute of Applied Physics, Wiedner Hauptstrasse 8-10, A-1040, Vienna, Austria

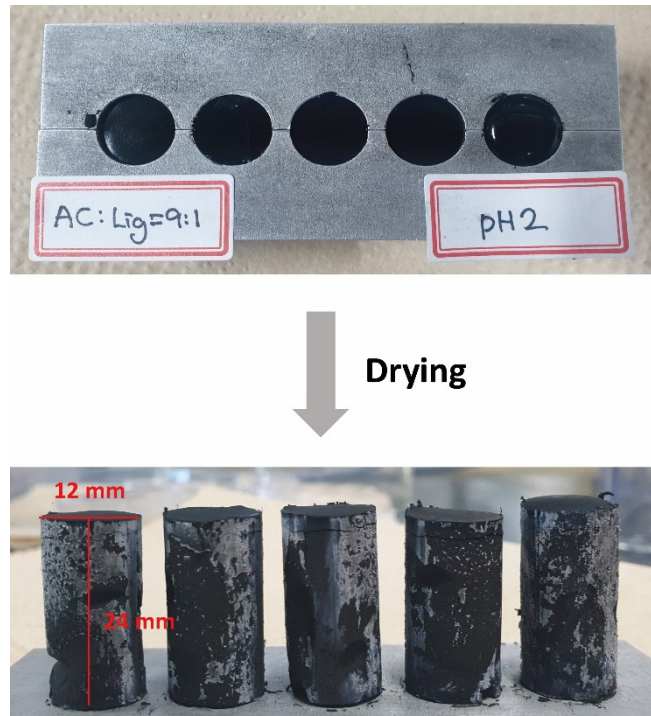

**Fig. S1** Lignin-activated carbon composites specimen at pH 2 solution before drying and after drying.

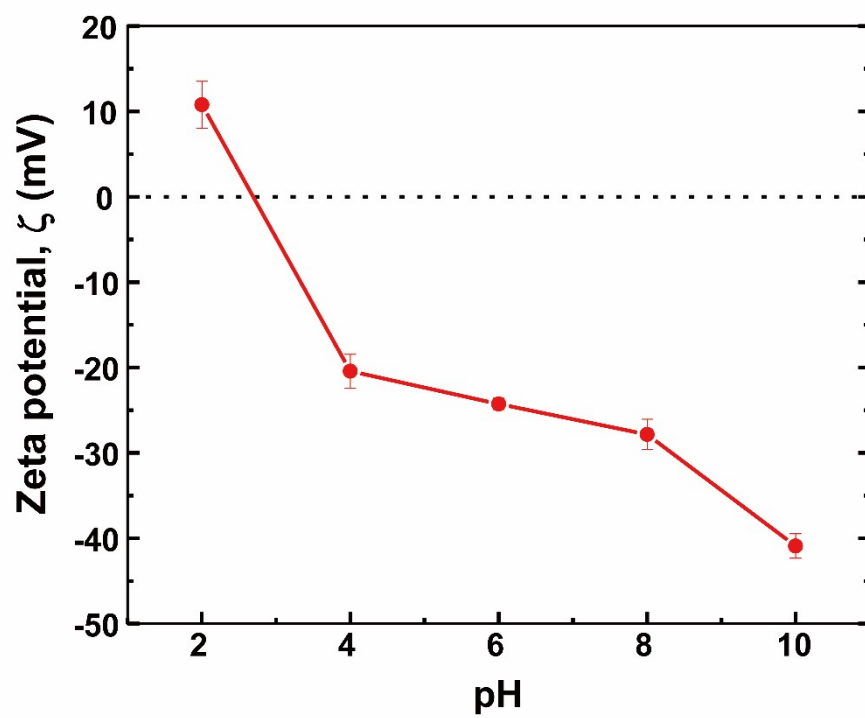

Fig. S2 Zeta potential of lignin at various pH solutions (pH 2 ~ pH 10), adjusted with HNO<sub>3</sub> and NaOH.

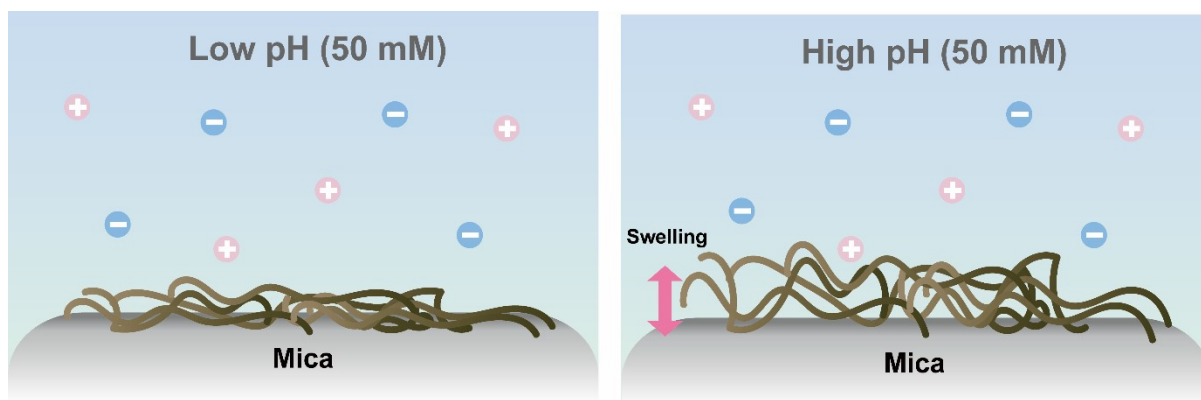

**Fig. S3** Schematic illustration of lignin swelling in 50 mM solution at low pH and high pH, respectively.

Fitting equation:  $y = y_0 + A_1 e^{-x/\lambda}$

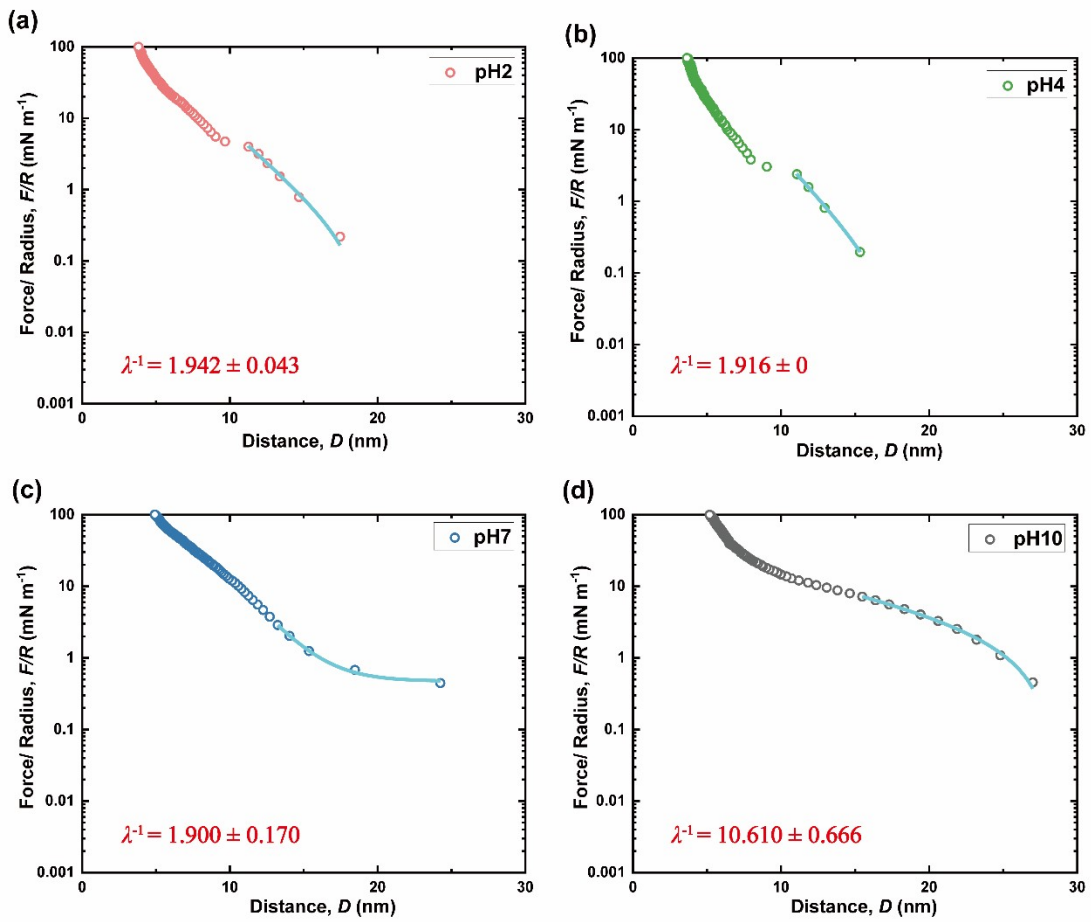

**Fig. S4** Decay length fitting at SFA force–distance profiles of lignin–lignin interactions in (a) pH 2, (b) pH 4, (c) pH 7, and (d) pH 10.

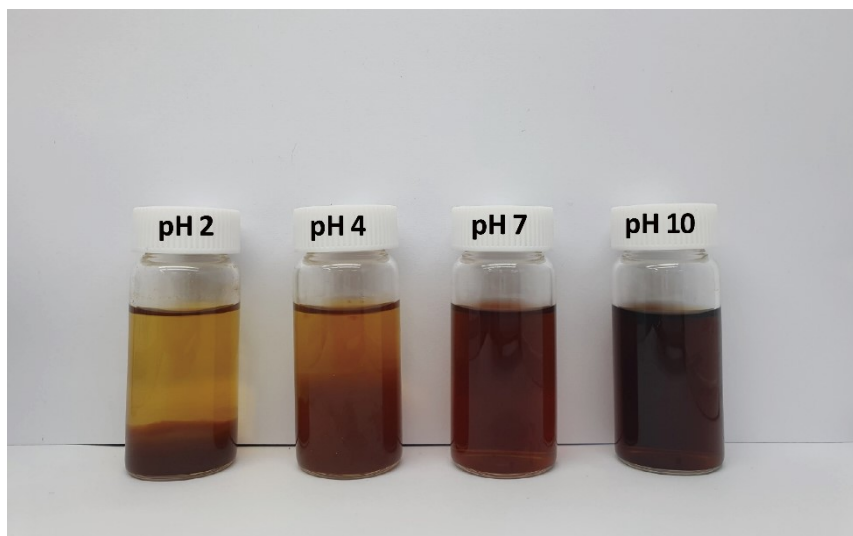

**Fig. S5** Photograph of prepared lignin solution (5 mg/ml) in water with different pH conditions: 2.0, 4.0, 7.0, 10.0.

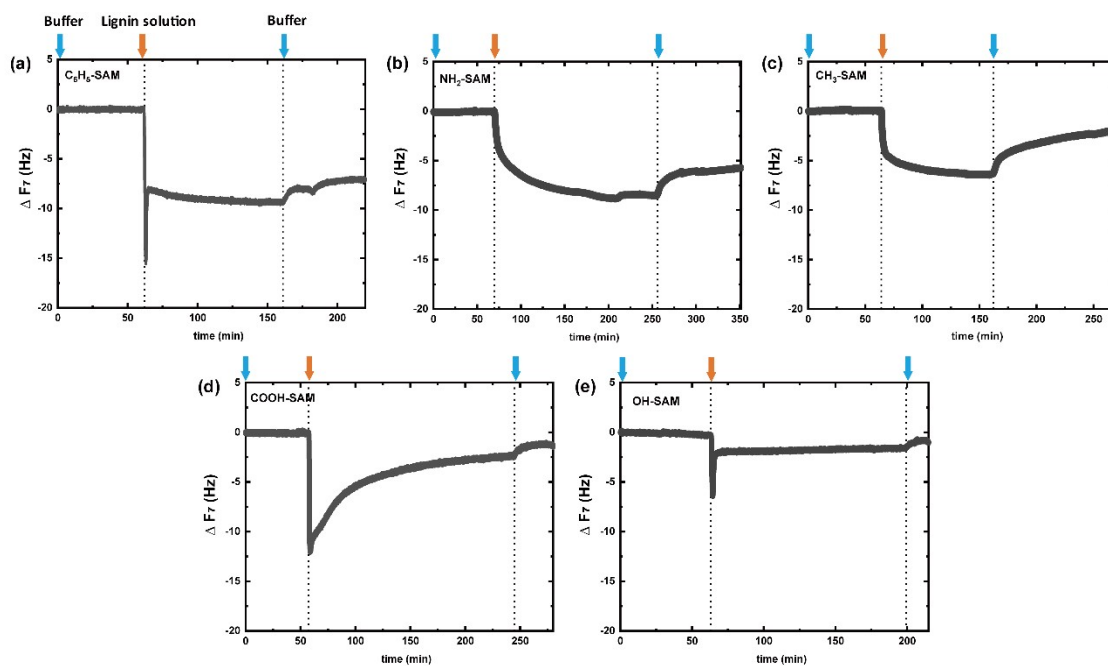

**Fig. S6** QCM-D measurements of lignin adsorption on each SAM coated gold surface; (a)  $C_6H_5$ , (b)  $NH_2$  (c)  $CH_3$ , (d)  $COOH$ , and (e)  $OH$ . Blue and orange arrows indicate injection of buffer and lignin solution, respectively.

**Table S1** Amount of sodium hydroxide, nitric acid, and sodium nitrate in total volume of solution at each pH buffer solution.

| <b>pH</b>                                           | <b>2</b> | <b>4</b> | <b>7</b> | <b>10</b> |
|-----------------------------------------------------|----------|----------|----------|-----------|
| <b>Amount of NaOH [mg]</b>                          | 48.6     | 99.5     | 100.0    | 100.5     |
| <b>Amount of 10 M HNO<sub>3</sub> solution [ml]</b> | 0.25     | 0.25     | 0.25     | 0.25      |
| <b>Additional amount of NaNO<sub>3</sub> [mg]</b>   | 267.6    | 213      | 212.5    | 212.0     |



**Table S2**  $pK_a$  values of each SAM tested in this research.

| <b>Functionalized SAM</b>                                             | <b><math>pK_a^{1-3}</math></b> |
|-----------------------------------------------------------------------|--------------------------------|
| 11-hydroxy-1-undecanethiol<br><b>(OH-SAM)</b>                         | <b>16-18</b>                   |
| 10-carboxy-1-decanethiol<br><b>(COOH-SAM)</b>                         | <b>5.5</b>                     |
| 2-phenylethanethiol<br><b>(C<sub>6</sub>H<sub>5</sub>-SAM)</b>        | -                              |
| 1-undecanethiol<br><b>(CH<sub>3</sub>-SAM)</b>                        | -                              |
| 11-amino-1-undecanethiol hydrochloride<br><b>(NH<sub>2</sub>-SAM)</b> | <b>7.5</b>                     |

**Table S3** The theoretical and fitted Debye-length value from decay length fitting

| <b>pH</b>                                                       | <b>2</b>          | <b>4</b>      | <b>7</b>          | <b>10</b>          |
|-----------------------------------------------------------------|-------------------|---------------|-------------------|--------------------|
| <b>Debye length, <math>\kappa^{-1}</math>; nm (Theoretical)</b> | 1.923             | 1.923         | 1.923             | 1.923              |
| <b>Decay length, <math>\lambda^{-1}</math>; nm (Fitted)</b>     | $1.942 \pm 0.043$ | $1.916 \pm 0$ | $1.900 \pm 0.170$ | $10.610 \pm 0.666$ |

## Supplementary References

1. G. C. Shields, *Computational approaches for the prediction of pKa values*, CRC Press, 2019.
2. H. Zhang, H.-X. He, J. Wang, T. Mu and Z.-F. Liu, *Applied Physics A*, 1998, **66**, S269-S271.
3. D. V. Vezenov, A. Noy, L. F. Rozsnyai and C. M. Lieber, *Journal of the American Chemical Society*, 1997, **119**, 2006-2015.
